# Supplementary material for: Tracing genomic variations in two highly virulent Yersinia enterocolitica strains with unequal ability to compete for host colonization
Source: PubMed Central journal article supplement (PMC3469391; doi:10.1186/1471-2164-13-467), 2012-09-11

A

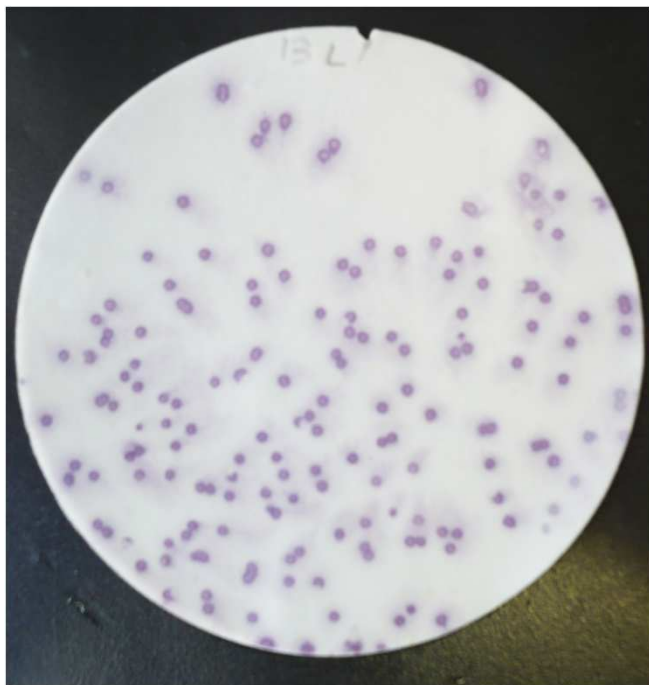

B

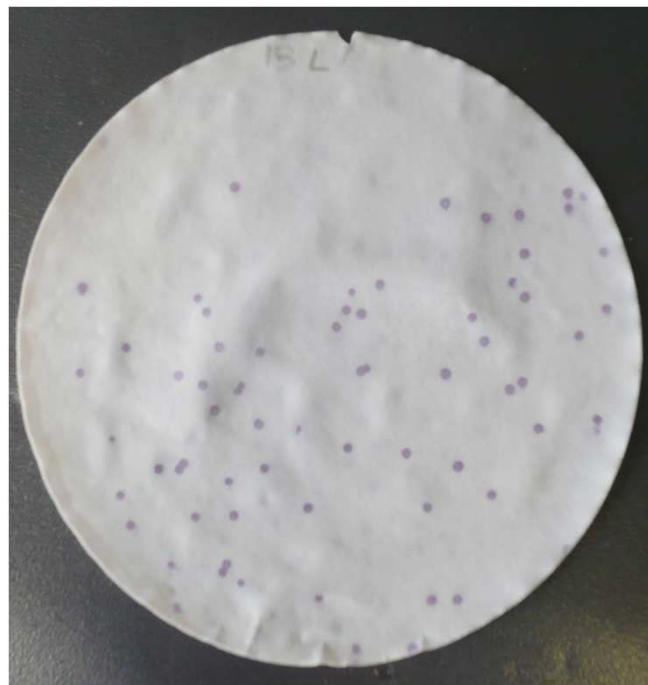

C

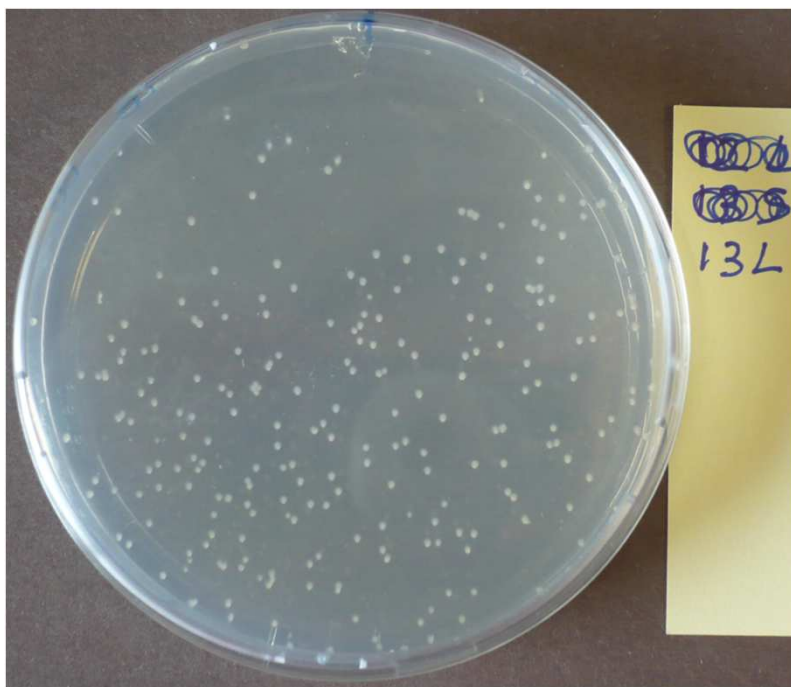

D

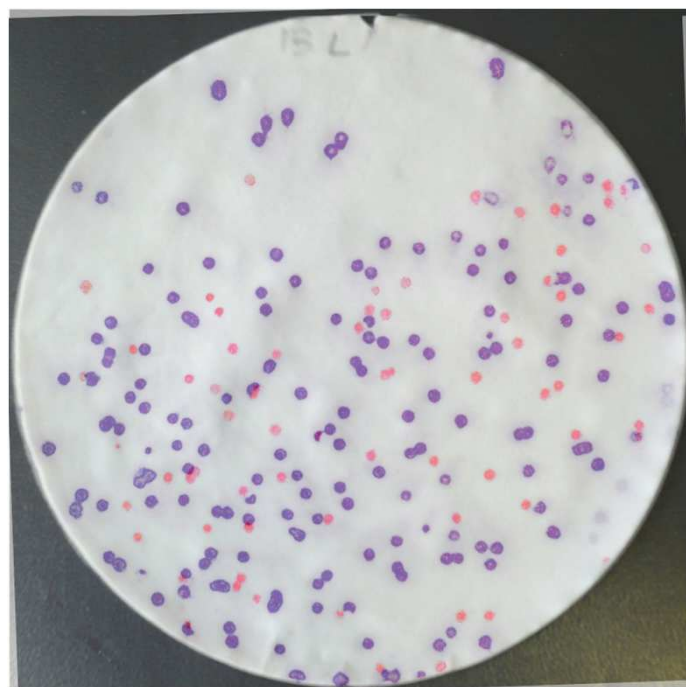

Supplement: 1471-2164-13-467-S1.pdf [file 1471-2164-13-467-S1.pdf]
